# Supplementary material
Source: publisher figshare collection journal article supplement (https://sage.figshare.com/ndownloader/files/13724789)
Supplement: Supplementary file [file 13724789]

**Supplementary file 2.** All outcome domains which failed to reach the pre-specified consensus definition based on the e-Delphi round 3 voting. \*Note that participants voted to consider ‘sense of control’ during the face-to-face meeting of the sound-based intervention instead of ‘helplessness’.

| <b>Sound-based interventions</b>                            | <b>Psychology-based interventions</b>                       | <b>Pharmacology-based interventions</b>                     |
|-------------------------------------------------------------|-------------------------------------------------------------|-------------------------------------------------------------|
| Active myofascial trigger points                            | Ability to relax                                            | Behaviour                                                   |
| Adverse reaction                                            | Active myofascial trigger points                            | Ability to relax                                            |
| Anger                                                       | Adverse reaction                                            | Acceptance of tinnitus                                      |
| Behaviour                                                   | Anger                                                       | Active myofascial trigger points                            |
| Bodily complaints                                           | Behaviour                                                   | Anger                                                       |
| Brain structure                                             | Bodily complaints                                           | Bodily complaints                                           |
| Catastrophising                                             | Brain structure                                             | Brain structure                                             |
| Change in sense of self                                     | Change in sense of self                                     | Catastrophising                                             |
| Confusion                                                   | Confusion                                                   | Change in sense of self                                     |
| Device usage                                                | Conversations                                               | Conversations                                               |
| Distress from bodily sensations                             | Device usage                                                | Device usage                                                |
| Fat metabolism                                              | Distress from bodily sensations                             | Distress from bodily sensations                             |
| Fear                                                        | Fat metabolism                                              | Fat metabolism                                              |
| Feeling tired                                               | Feeling tired                                               | Fear                                                        |
| Frequency of occurrence of tinnitus episodes                | Frequency of occurrence of tinnitus episodes                | Feeling tired                                               |
| Gene expression                                             | Gene expression                                             | Frequency of occurrence of tinnitus episodes                |
| Guilt                                                       | Guilt                                                       | Gene expression                                             |
| Ill health                                                  | Ill health                                                  | Guilt                                                       |
| Impact on relationships                                     | Irrational beliefs                                          | Helplessness (lack of control)                              |
| Irrational beliefs                                          | Joyful                                                      | Ill health                                                  |
| Irritable                                                   | Lack of perceived support 'nobody understanding experience' | Impact on relationships                                     |
| Joyful                                                      | Listening                                                   | Irrational beliefs                                          |
| Lack of perceived support 'nobody understanding experience' | Loss of appetite                                            | Irritable                                                   |
| Loss of appetite                                            | Loss of peace                                               | Joyful                                                      |
| Loss of peace                                               | Monitoring                                                  | Lack of perceived support 'nobody understanding experience' |
| Monitoring                                                  | Neck mobility                                               | Listening                                                   |
| Mood                                                        | Neck pain                                                   | Loss of appetite                                            |
| Neck mobility                                               | Need for knowledge                                          | Loss of peace                                               |
| Neck pain                                                   | Nervous                                                     | Monitoring                                                  |
| Need for knowledge                                          | Neural activity                                             | Mood                                                        |
| Negative thoughts/beliefs                                   | Neuroendocrine hormones                                     | Neck mobility                                               |
| Nervous                                                     | Oxidative stress                                            | Neck pain                                                   |
| Neural activity                                             | Pain                                                        | Need for knowledge                                          |

|                                                 |                                                 |                                                 |
|-------------------------------------------------|-------------------------------------------------|-------------------------------------------------|
| Neuroendocrine hormones                         | Pharmacodynamics                                | Negative thoughts/beliefs                       |
| Oxidative stress                                | Pharmacokinetics                                | Nervous                                         |
| Pain                                            | Seeking support                                 | Neural activity                                 |
| Pharmacodynamics                                | Self-harm                                       | Neuroendocrine hormones                         |
| Pharmacokinetics                                | Sexual difficulties                             | Oxidative stress                                |
| Seeking support                                 | Support from family and friends                 | Pain                                            |
| Self-harm                                       | Teeth clenching                                 | Pharmacodynamics                                |
| *Sense of control                               | Tinnitus awareness                              | Pharmacokinetics                                |
| Sexual difficulties                             | Tinnitus location                               | Seeking support                                 |
| Suicidal thoughts                               | Tinnitus loudness                               | Self-harm                                       |
| Support from family and friends                 | Tinnitus pitch                                  | Sense of control                                |
| Teeth clenching                                 | Tinnitus quality                                | Sexual difficulties                             |
| Tinnitus location                               | Tinnitus unpleasantness                         | Suicidal thoughts                               |
| Tinnitus loudness                               | Treatment satisfaction                          | Support from family and friends                 |
| Tinnitus pitch                                  | Upset                                           | Teeth clenching                                 |
| Tinnitus quality                                | Withdrawal from treatment in the clinical trial | Tinnitus awareness                              |
| Tinnitus-related thoughts                       |                                                 | Tinnitus location                               |
| Upset                                           |                                                 | Tinnitus pitch                                  |
| Withdrawal from treatment in the clinical trial |                                                 | Tinnitus quality                                |
| Worries/concerns                                |                                                 | Tinnitus-related thoughts                       |
|                                                 |                                                 | Upset                                           |
|                                                 |                                                 | Withdrawal from treatment in the clinical trial |
|                                                 |                                                 | Worries/concerns                                |
